# Supplementary material for: Promotion of the oxygen evolution reaction via the reconstructed active phase of perovskite oxide
Source: Royal Society of Chemistry journal article supplement (doi:10.1039/d1ta08445c), 2021-12-06
Supplement: d1ta08445c1.pdf [file d1ta08445c1.pdf]

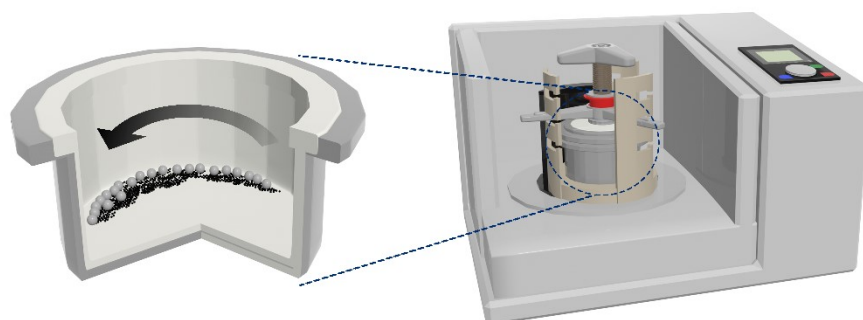

**Fig. S1.** Illustration of the super-mill process.

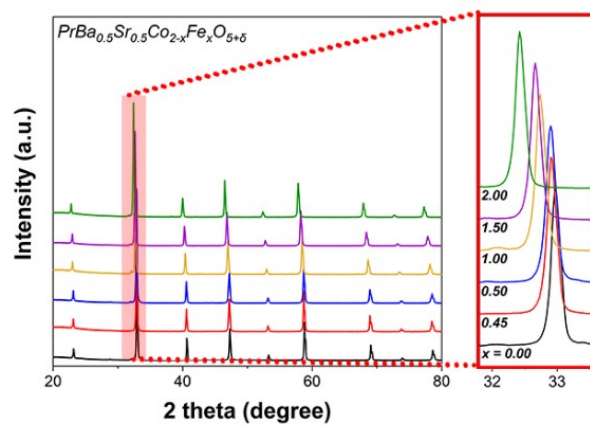

**Fig. S2.** X-ray diffraction patterns of PBSCF catalysts.

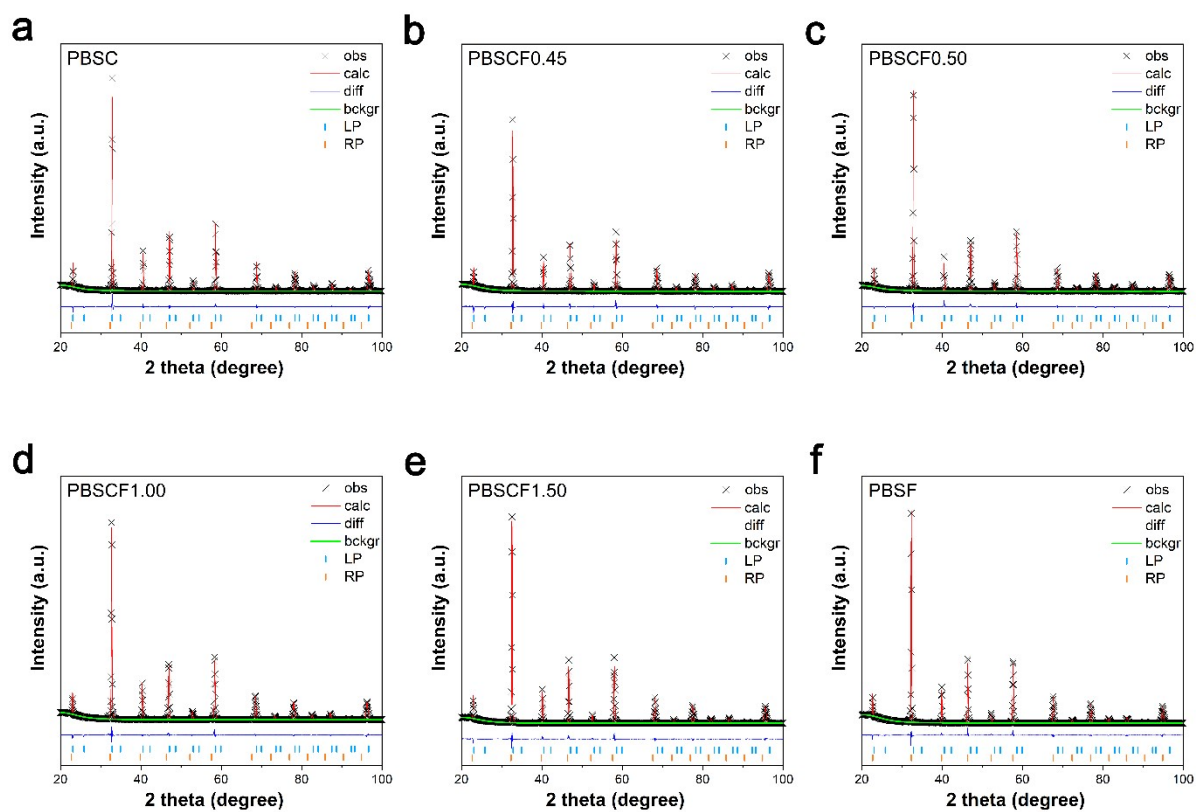

**Fig. S3.** Rietveld refinement of XRD patterns of PBSCF. The lattice parameter is shown in Table S2.

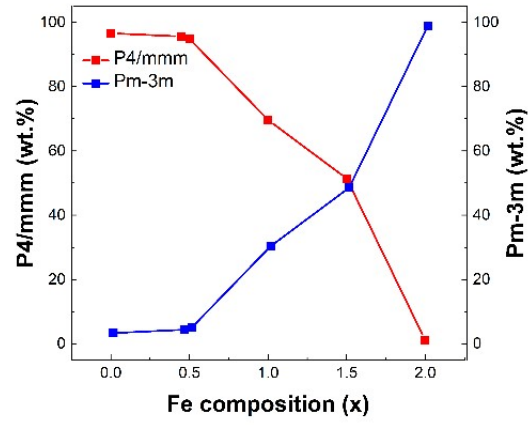

**Fig. S4.** The ratio of RP ( $Pm-3m$ ) and LP ( $P4/mmm$ ) was calculated by the results of the Rietveld refined XRD pattern of PBSCF.

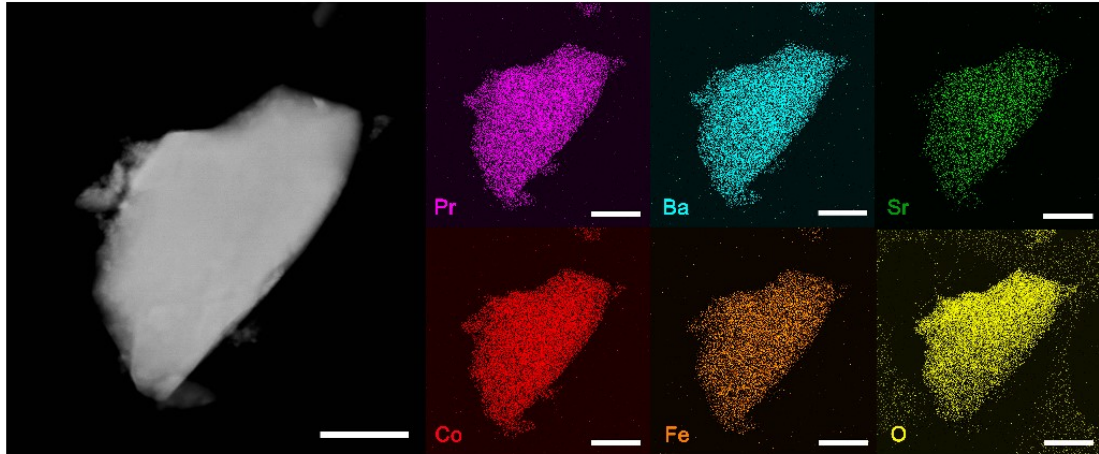

**Fig. S5.** Dark-filed scanning transmission electron microscope (STEM) image and STEM-EDS element mapping of PBSCF0.45 (Scale bar: 100 nm).

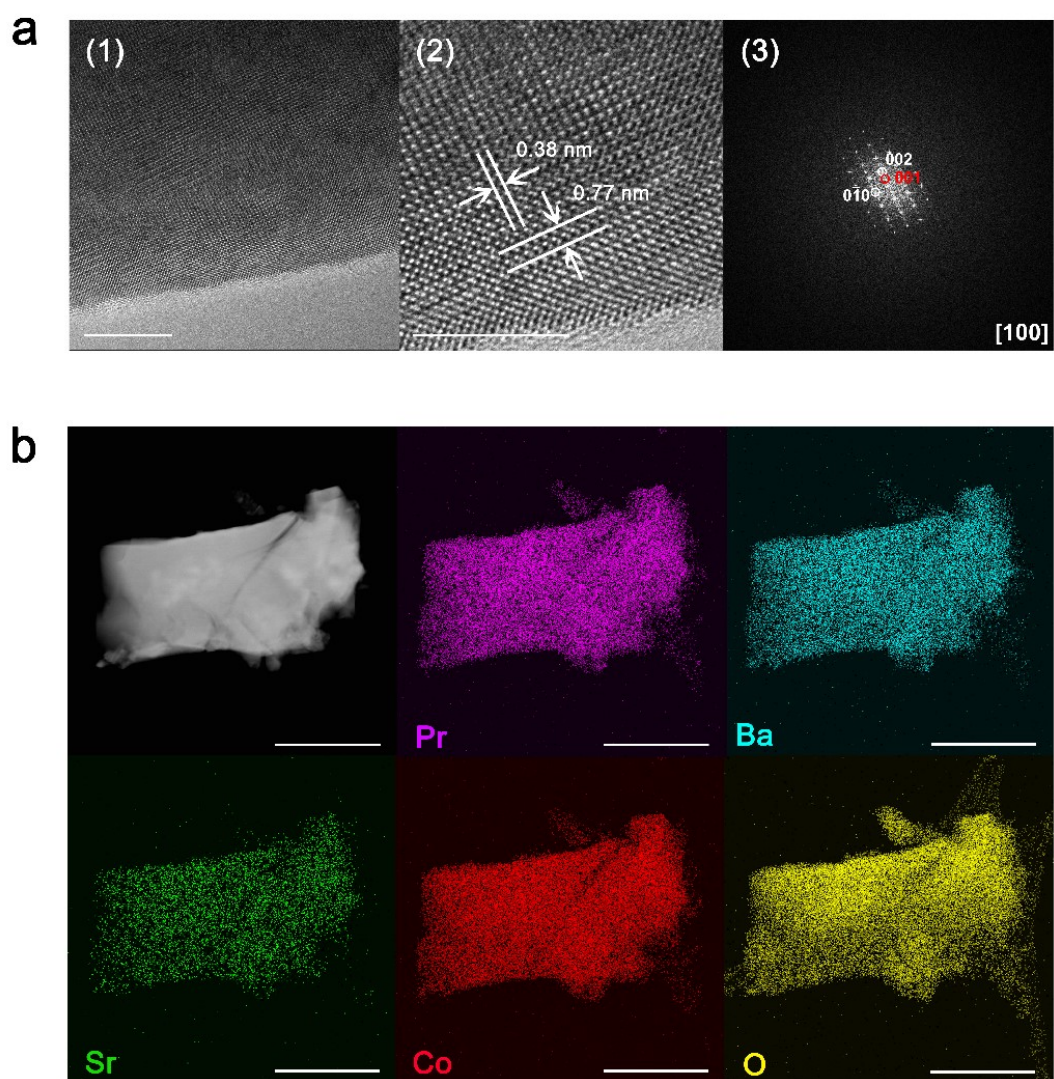

**Fig. S6.** a) HR-TEM image of PBSC, and (3) corresponding FFT pattern (Scale bar: (1) 10 nm and (2) 5 nm). b) STEM image and STEM-EDS element mapping of PBSC (Scale bar: 500 nm).

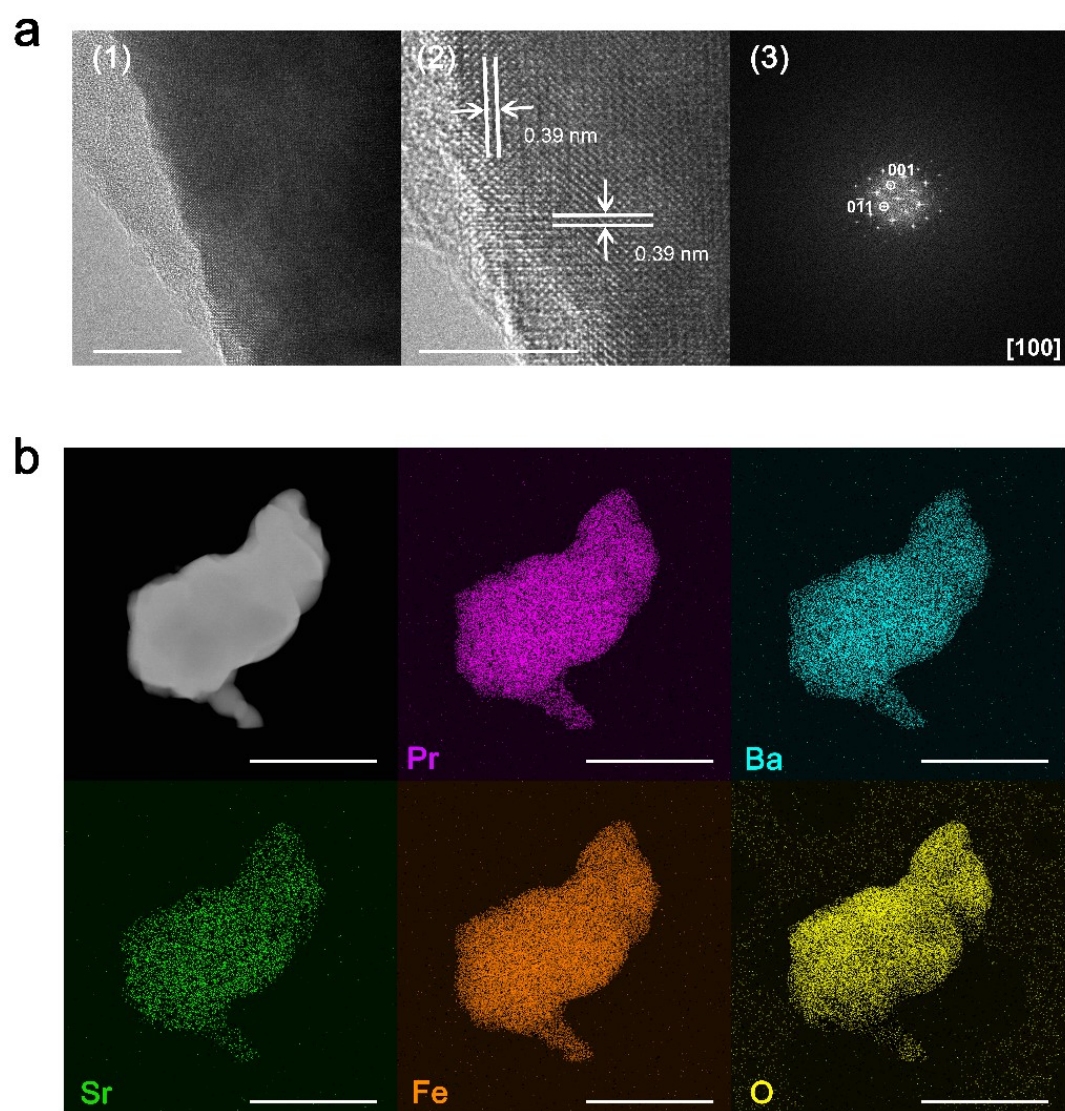

**Fig. S7.** a) HR-TEM image of PBSF, and (3) corresponding FFT pattern (Scale bar: (1) 10 nm and (2) 5 nm). b) STEM image and STEM-EDS element mapping of PBSF (Scale bar: 1  $\mu\text{m}$ ).

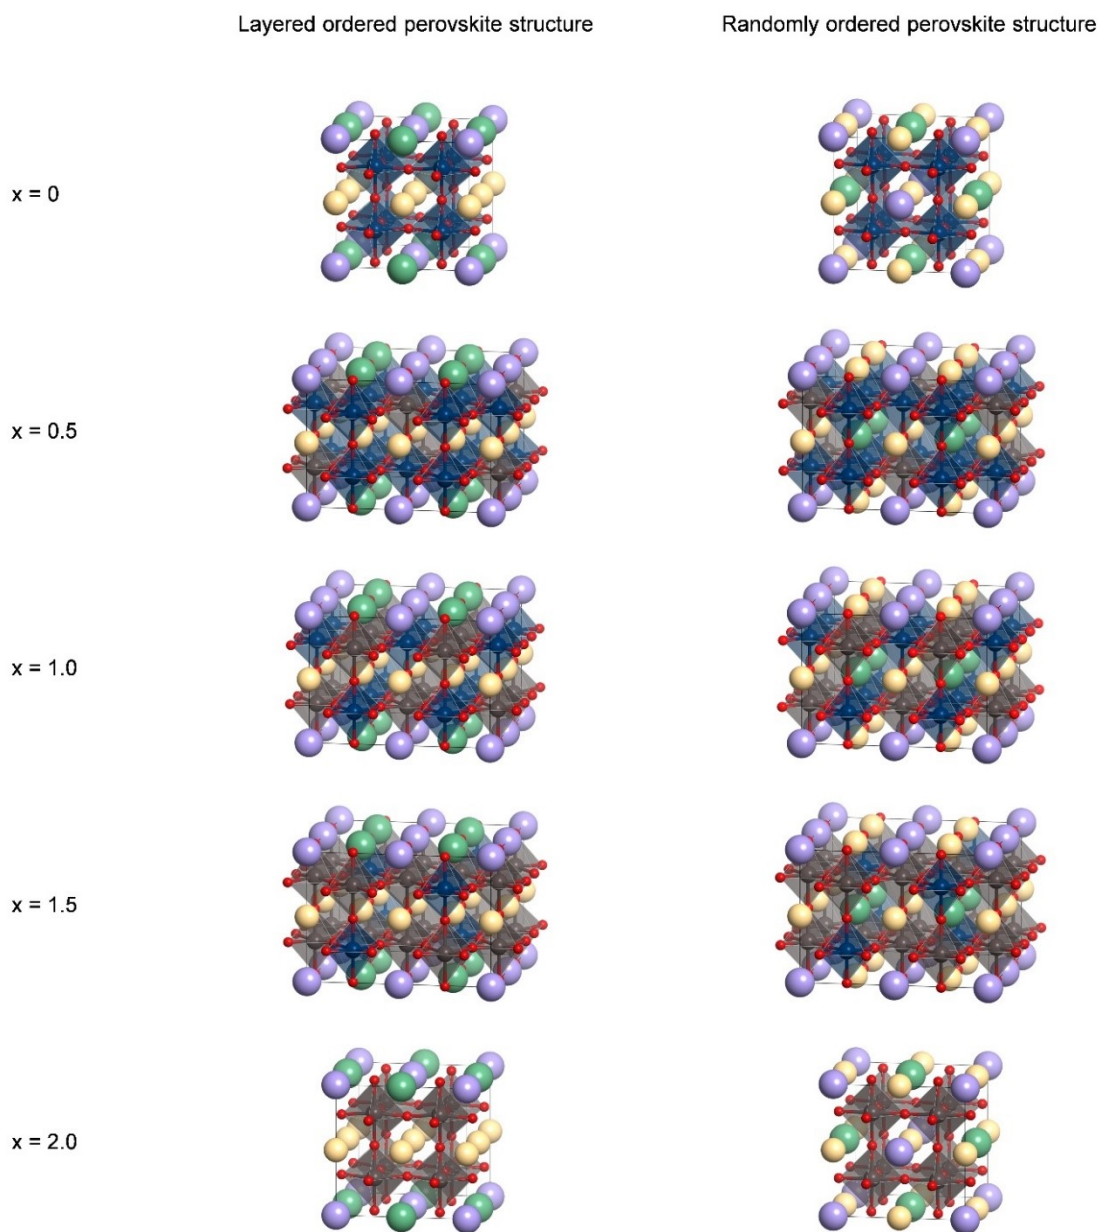

**Fig. S8.** Optimized structures of layered and randomly ordered  $\text{PrBa}_{0.5}\text{Sr}_{0.5}\text{Co}_{2-x}\text{Fe}_x\text{O}_6$  ( $x = 0, 0.5, 1.0, 1.5,$  and  $2.0$ ). Praseodymium, barium, strontium, cobalt, iron, and oxygen are yellow, green, purple, blue, brown, and red, respectively.



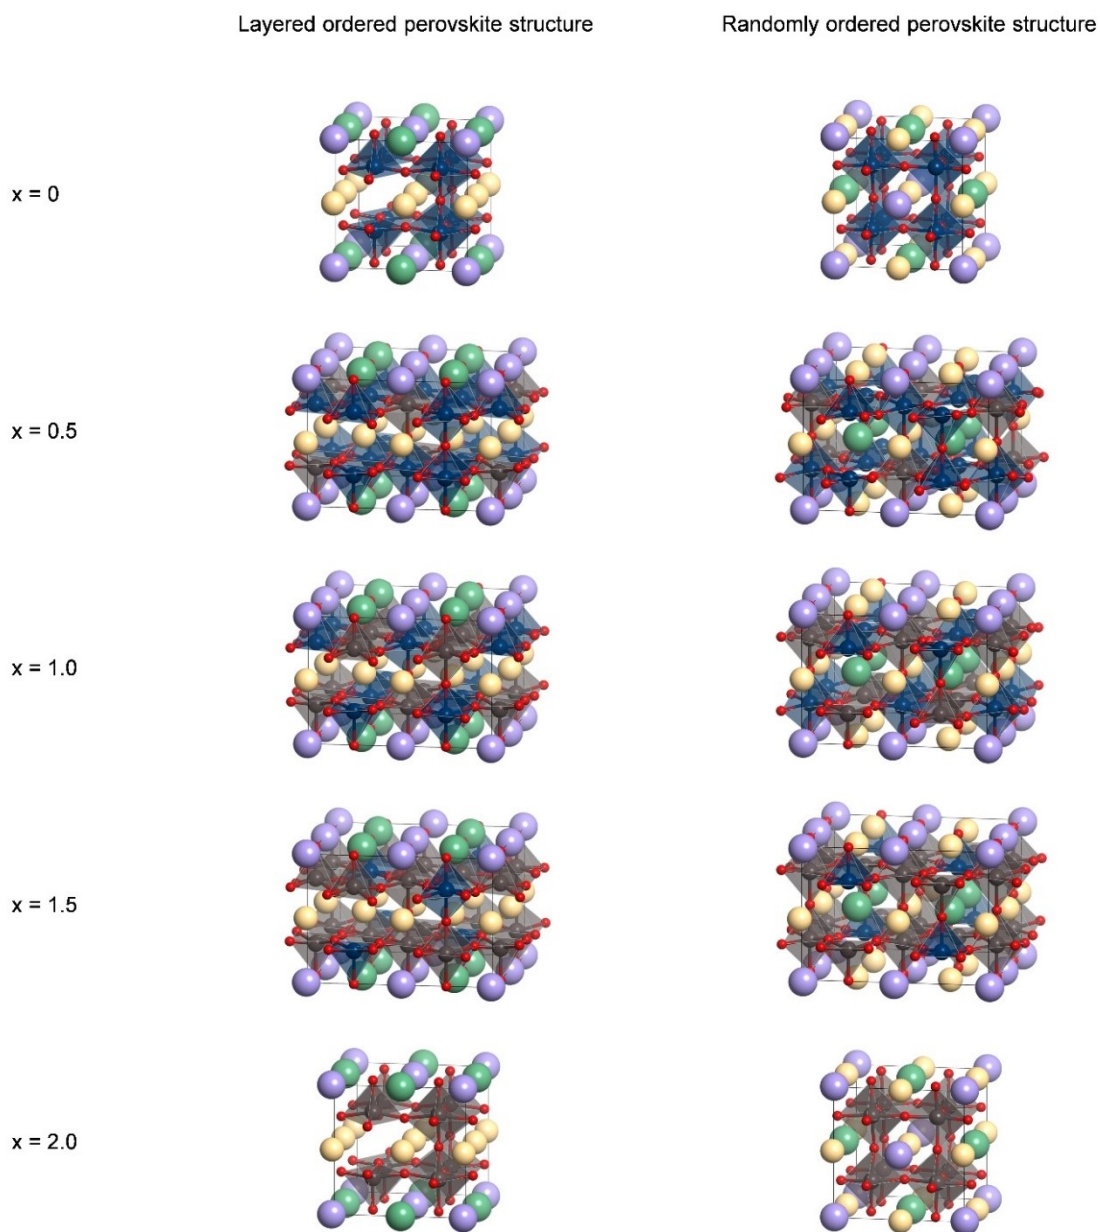

**Fig. S9.** Optimized structures of layered and randomly ordered  $\text{PrBa}_{0.5}\text{Sr}_{0.5}\text{Co}_{2-x}\text{Fe}_x\text{O}_{5.5}$  ( $x = 0, 0.5, 1.0, 1.5,$  and  $2.0$ ). Praseodymium, barium, strontium, cobalt, iron and oxygen are yellow, green, purple, blue, brown and red, respectively.

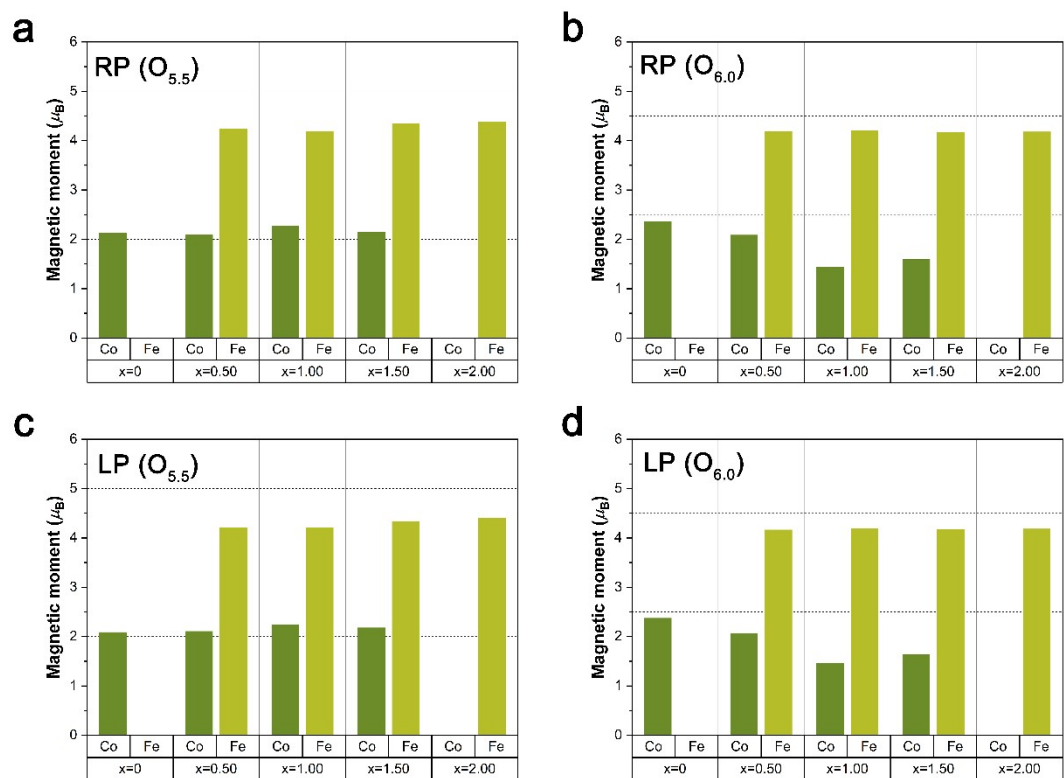

**Fig. S10.** The average magnetic moment of Co and Fe for PBSCF catalysts of RP structure at (a)  $\delta = 0.5$  and (b)  $\delta = 0.0$ . The average magnetic moment of Co and Fe for PBSCF catalysts of LP structure at (c)  $\delta = 0.5$  and (d)  $\delta = 0.0$ .

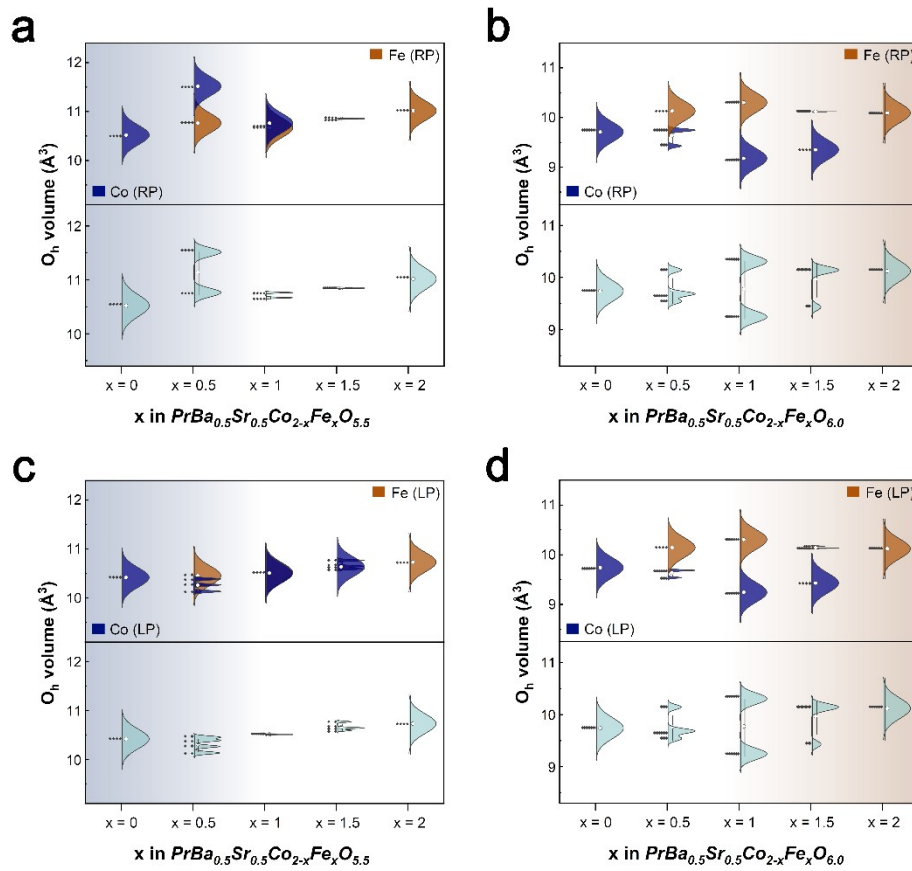

**Fig. S11.** Distribution of  $\text{CoO}_6$  and  $\text{FeO}_6$  octahedron volume for PBSCF catalysts of RP structure at (a)  $\delta = 0.5$  and (b)  $\delta = 0.0$ . Distribution of  $\text{CoO}_6$  and  $\text{FeO}_6$  octahedron volume for PBSCF catalysts of LP structure at (c)  $\delta = 0.5$  and (d)  $\delta = 0.0$ .

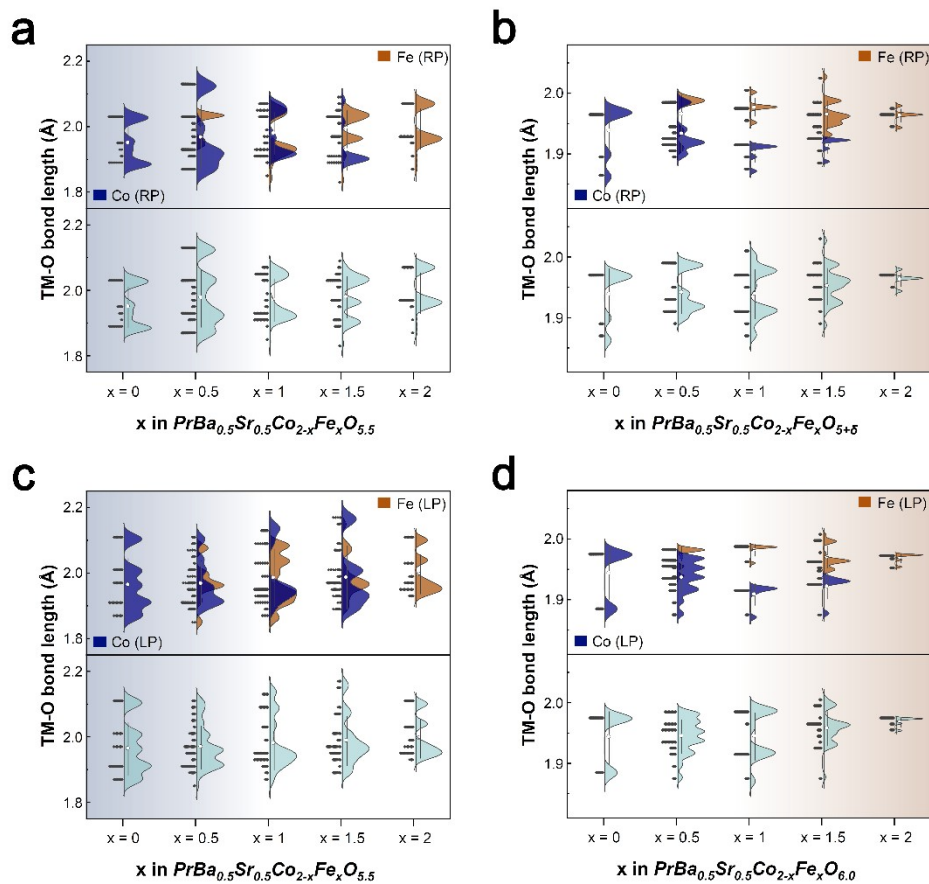

**Fig. S12.** Co-O and Fe-O bond length for PBSCF catalysts of RP structure at (a)  $\delta = 0.5$  and (b)  $\delta = 0.0$ . Co-O and Fe-O bond length for PBSCF catalysts of LP structure at (c)  $\delta = 0.5$  and (d)  $\delta = 0.0$ .

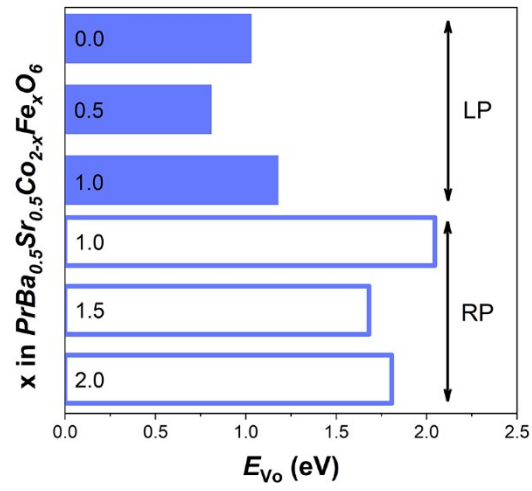

**Fig. S13.** Oxygen vacancy formation energy ( $E_{\text{Vo}}$ ) of major phase for each Fe content (i.e., LP structure at  $x < 1$  and RP structure at  $x > 1$ ,  $\text{PrBa}_{0.5}\text{Sr}_{0.5}\text{Co}_{2-x}\text{Fe}_x\text{O}_6$ ).

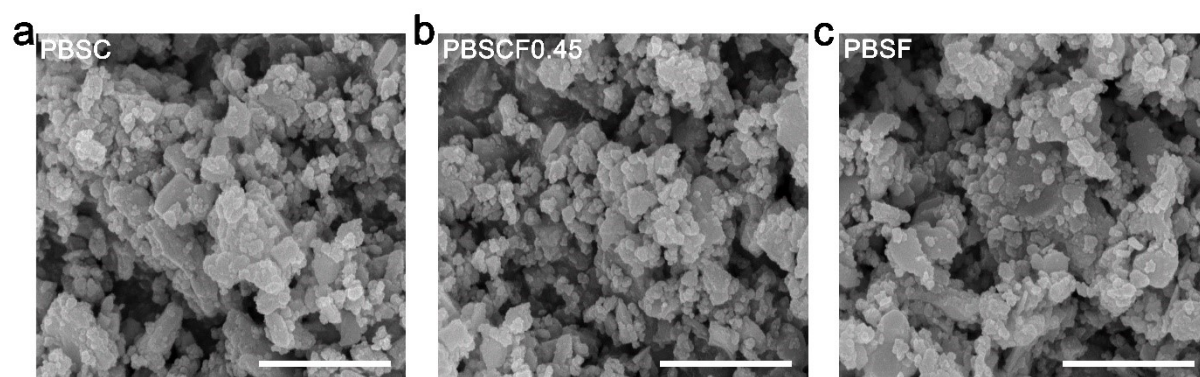

**Fig. S14.** SEM image of (a) PBSC, (b) PBSCF0.45 and (c) PBSF (Scale bar: 1  $\mu\text{m}$ ).

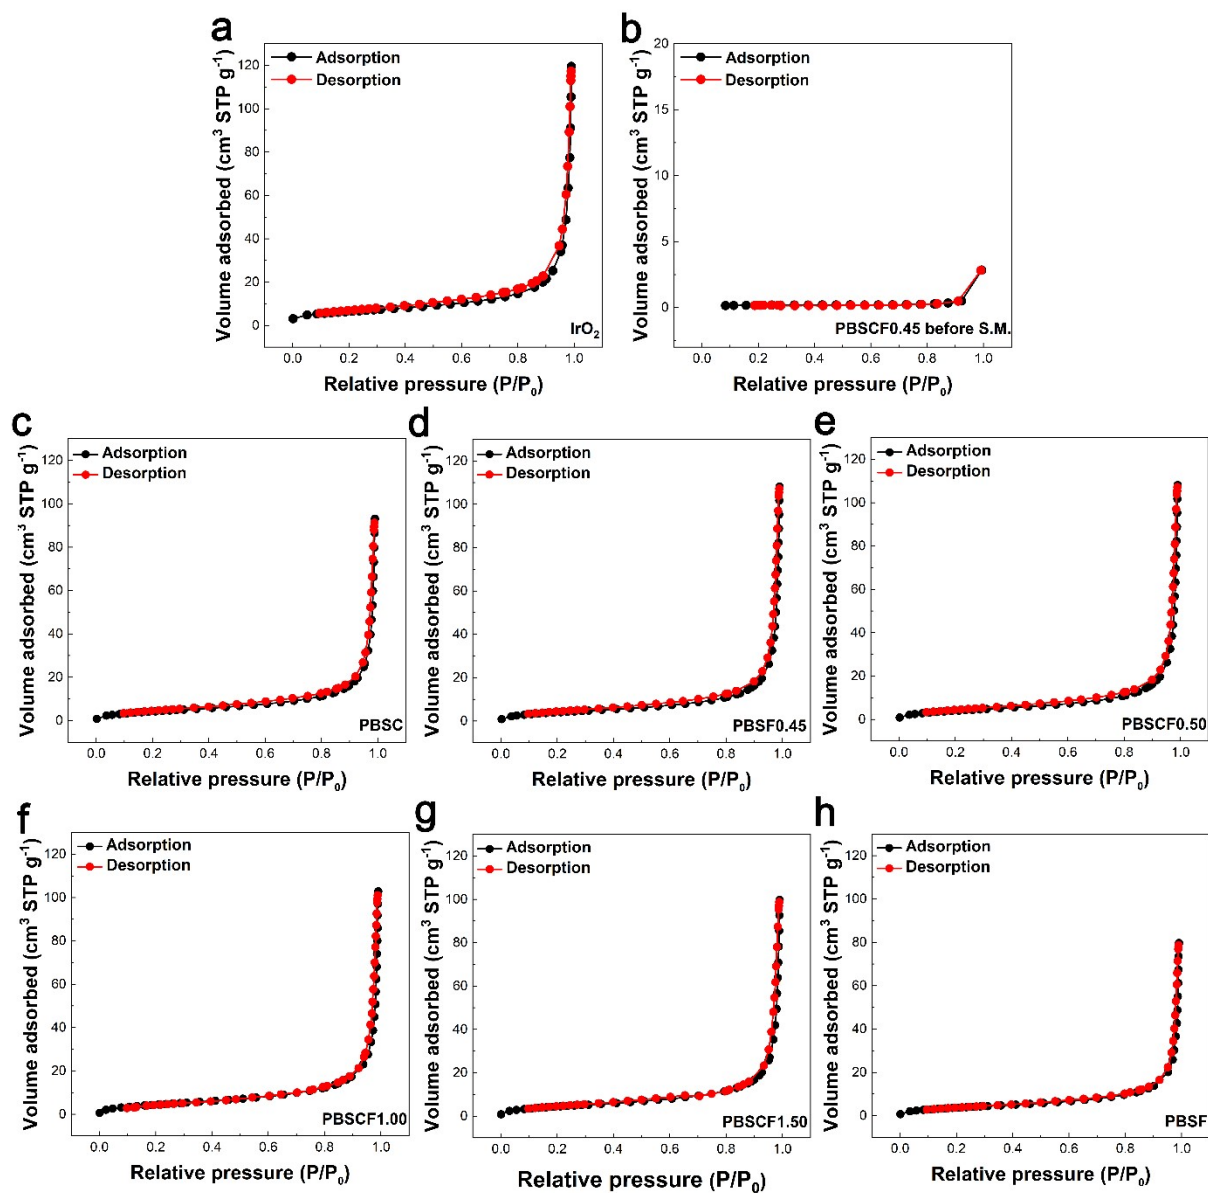

**Fig. S15.** N<sub>2</sub> adsorption/desorption isotherms of a) IrO<sub>2</sub>, b) PBSCF0.45 before S.M. and c-h) PBSCF catalysts. BrunauerEmmett-Teller (BET) specific surface areas and pore size distribution calculated by the results of N<sub>2</sub> adsorption/desorption isotherms are shown in Table S3.

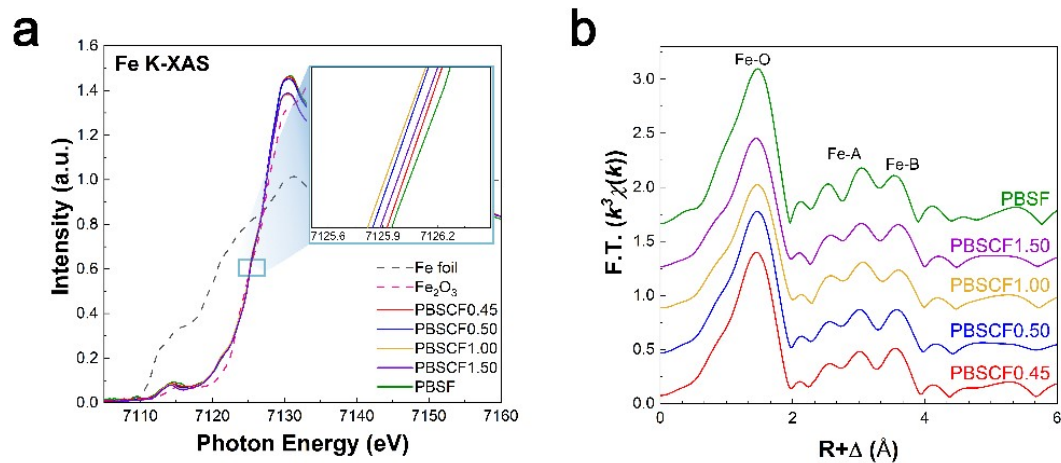

**Fig. S16.** a) Normalized Fe K-edge XANES of PBSCF catalysts. The inset shows the photon energy at an intensity of 0.8. b) Fourier transforms of Fe K-edge  $k^3$ -weighted EXAFS for PBSCF catalysts.



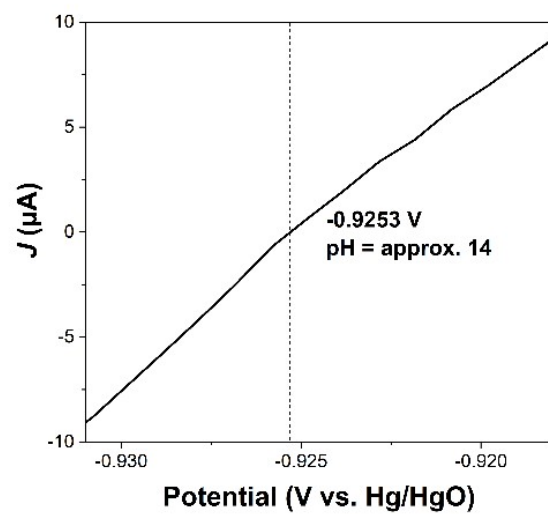

**Fig. S17.** RHE calibration. For the RHE calibration of the Hg/HgO reference electrode, the potential was swept at  $1 \text{ mV s}^{-1}$  in  $\text{H}_2$  saturated 1 M KOH. Pt wire was used as the working and counter electrode.

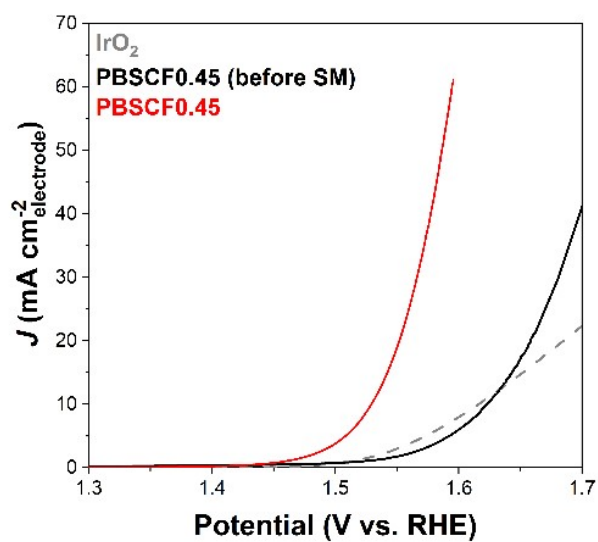

**Fig. S18.** CV curves of PBSCF, PBSCF before SM, and IrO<sub>2</sub> in N<sub>2</sub>-saturated 1M KOH solution.

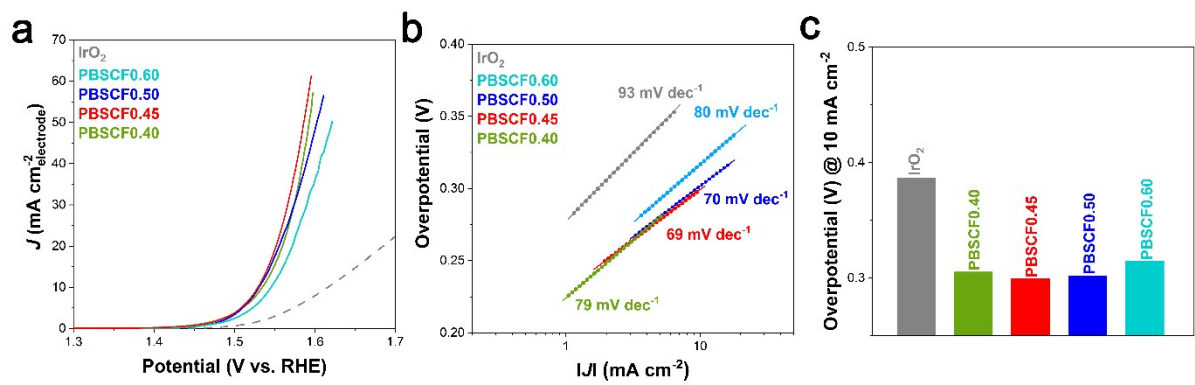

**Fig. S19.** CV curves of PBSCF0.40, PBSCF0.45, PBSCF0.50, and PBSCF0.60 in N<sub>2</sub>-saturated 1M KOH solution.

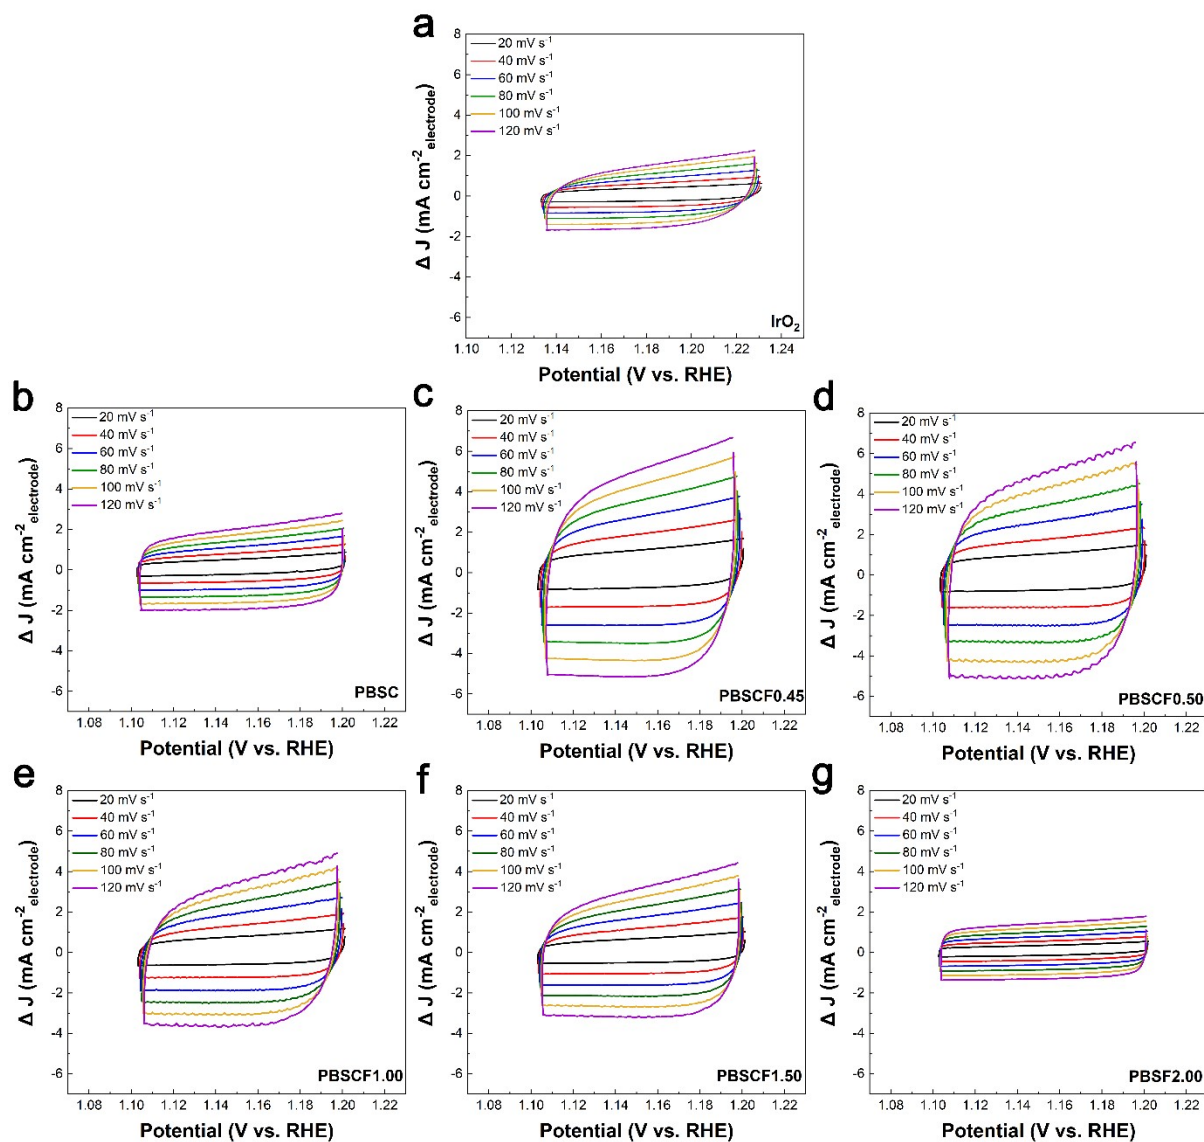

**Fig. S20.** Electrochemical CV scans were recorded for a)  $\text{IrO}_2$  and b-g) PBSCF catalysts at different potential scanning rates. Scan rates are 20, 40, 60, 80, 100, and  $120 \text{ mV s}^{-1}$ . The selected potential range where no faradic current was observed at 1.12 to 1.24 V vs. RHE.

**Table S1.** Chemical compositions and abbreviations of each sample.

| Compound                                                                              | Abbreviations |
|---------------------------------------------------------------------------------------|---------------|
| $\text{PrBa}_{0.5}\text{Sr}_{0.5}\text{Co}_{2-x}\text{Fe}_x\text{O}_{5+\delta}$       | PBSCF         |
| $\text{PrBa}_{0.5}\text{Sr}_{0.5}\text{Co}_{2.00}\text{O}_{5+\delta}$                 | PBSC          |
| $\text{PrBa}_{0.5}\text{Sr}_{0.5}\text{Co}_{1.55}\text{Fe}_{0.45}\text{O}_{5+\delta}$ | PBSCF0.45     |
| $\text{PrBa}_{0.5}\text{Sr}_{0.5}\text{Co}_{1.50}\text{Fe}_{0.50}\text{O}_{5+\delta}$ | PBSCF0.50     |
| $\text{PrBa}_{0.5}\text{Sr}_{0.5}\text{Co}_{1.00}\text{Fe}_{1.00}\text{O}_{5+\delta}$ | PBSCF1.00     |
| $\text{PrBa}_{0.5}\text{Sr}_{0.5}\text{Co}_{0.50}\text{Fe}_{1.50}\text{O}_{5+\delta}$ | PBSCF1.50     |
| $\text{PrBa}_{0.5}\text{Sr}_{0.5}\text{Fe}_{2.00}\text{O}_{5+\delta}$                 | PBSF          |

**Table S2.** Lattice information of PBSCF catalysts determined in Rietveld refinement.

| Sample                  | PBSC  | PBSCF0.45 | PBSCF0.50 | PBSCF1.00 | PBSCF1.50 | PBSF   |
|-------------------------|-------|-----------|-----------|-----------|-----------|--------|
| <i>Pm-3m</i><br>(wt.%)  | 3.36  | 4.4       | 5.07      | 30.34     | 48.6      | 98.9   |
| a (Å)                   | 3.86  | 3.865     | 3.866     | 3.872     | 3.894     | 3.915  |
| b (Å)                   | -     | -         | -         | -         | -         | -      |
| c (Å)                   | -     | -         | -         | -         | -         | -      |
| V (Å <sup>3</sup> )     | 57.51 | 57.75     | 57.77     | 58.05     | 59.04     | 59.9   |
| <i>P4/mmm</i><br>(wt.%) | 96.64 | 95.6      | 94.93     | 69.66     | 51.4      | 1.1    |
| a (Å)                   | 3.861 | 3.864     | 3.863     | 3.875     | 3.893     | 3.915  |
| b (Å)                   | -     | -         | -         | -         | -         | -      |
| c (Å)                   | 7.715 | 7.738     | 7.744     | 7.766     | 7.795     | 7.825  |
| V (Å <sup>3</sup> )     | 115   | 115.54    | 115.57    | 116.63    | 118.12    | 119.96 |
| R <sub>wp</sub>         | 6.44  | 4.71      | 4.79      | 5.33      | 6.64      | 5.45   |
| R <sub>p</sub>          | 4.15  | 3.1       | 3.43      | 3.27      | 3.93      | 3.52   |

**Table S3.** Brunauer-Emmett-Teller (BET) surface area analysis results of the IrO<sub>2</sub> benchmark catalyst and PBSCF catalysts.

| Sample                   | a <sub>s,BET</sub><br>(m <sup>2</sup> g <sup>-1</sup> ) | Total pore volume<br>(cm <sup>3</sup> g <sup>-1</sup> ) | Mean pore diameter<br>(nm) |
|--------------------------|---------------------------------------------------------|---------------------------------------------------------|----------------------------|
| IrO <sub>2</sub>         | 22.18                                                   | 0.1763                                                  | 31.80                      |
| PBSC                     | 17.51                                                   | 0.0467                                                  | 10.67                      |
| PBSCF0.45                | 18.65                                                   | 0.1968                                                  | 40.92                      |
| PBSCF0.50                | 18.39                                                   | 0.1764                                                  | 37.83                      |
| PBSCF1.00                | 17.72                                                   | 0.1588                                                  | 35.84                      |
| PBSCF1.50                | 17.79                                                   | 0.1565                                                  | 35.18                      |
| PBSF                     | 17.26                                                   | 0.0399                                                  | 9.25                       |
| PBSCF0.45<br>(before SM) | 1.51                                                    | 0.0071                                                  | 18.635                     |

**Table S4.** Comparison of electrocatalyst performance of IrO<sub>2</sub> benchmark catalyst and PBSCF catalysts for OER.  $\eta$  is the overpotential (V) at 10 mA cm<sup>-2</sup> from 1.23 V vs RHE, C<sub>dl</sub> is the double layer capacitance at 1.18 vs. RHE with different scan rates and R<sub>ct</sub> is the charge-transfer resistance at 1.48 V vs RHE.

| Sample           | $\eta$ (V) | Tafel slope (mV dec <sup>-1</sup> ) | C <sub>dl</sub> (mF cm <sup>-2</sup> ) | R <sub>ct</sub> ( $\Omega$ cm <sup>2</sup> ) |
|------------------|------------|-------------------------------------|----------------------------------------|----------------------------------------------|
| IrO <sub>2</sub> | 0.387      | 99                                  | 12.19                                  | 33.47                                        |
| PBSC             | 0.356      | 98                                  | 16.35                                  | 26.73                                        |
| PBSCF0.45        | 0.299      | 69                                  | 42.23                                  | 4.53                                         |
| PBSCF0.50        | 0.302      | 70                                  | 41.52                                  | 4.60                                         |
| PBSCF1.00        | 0.333      | 84                                  | 28.99                                  | 13.04                                        |
| PBSCF1.50        | 0.344      | 93                                  | 26.25                                  | 15.87                                        |
| PBSF             | 0.373      | 124                                 | 15.95                                  | 29.26                                        |



**Table S5.** Survey of overpotential at 10 mA cm<sup>-2</sup> current density for OER electrocatalyst in 1M KOH electrolyte.

| Catalyst                                                                                                                                                                                 | Current density (mA cm <sup>-2</sup> ) | Overpotential (V) | Electrolyte | Ref.                                                    |
|------------------------------------------------------------------------------------------------------------------------------------------------------------------------------------------|----------------------------------------|-------------------|-------------|---------------------------------------------------------|
| PBSCF0.45                                                                                                                                                                                | 10                                     | 0.29              | 1 M KOH     | This work                                               |
| IrO <sub>2</sub>                                                                                                                                                                         | 10                                     | 0.38              | 1 M KOH     | This work                                               |
| La <sub>0.8</sub> Sr <sub>0.2</sub> Co <sub>0.6</sub> Ni <sub>0.4</sub> O <sub>3-δ</sub>                                                                                                 | 10                                     | 0.29              | 1 M KOH     | J. Alloys Compd. 831, 154728 (2020)                     |
| SrFe <sub>0.57</sub> Co <sub>0.27</sub> Mo <sub>0.16</sub> O <sub>2.99</sub> /Sr <sub>2</sub> Fe <sub>0.85</sub> Co <sub>0.17</sub> Mo <sub>0.56</sub> Ni <sub>0.42</sub> O <sub>6</sub> | 10                                     | 0.29              | 1 M KOH     | ChemSusChem. 13, 11, 3045-3052 (2020)                   |
| SrCo <sub>0.2</sub> Fe <sub>0.2</sub> W <sub>0.4</sub> O <sub>3-δ</sub>                                                                                                                  | 10                                     | 0.30              | 1 M KOH     | J. Mater. Chem. A. 6, 9854-9859 (2018)                  |
| LaFeNiO <sub>3</sub> Nanorods                                                                                                                                                            | 10                                     | 0.30              | 1 M KOH     | Angew. Chem. Int. Ed. 131, 18, 2338-2342 (2019)         |
| Ba <sub>0.9</sub> Sr <sub>0.1</sub> Co <sub>0.8</sub> Fe <sub>0.1</sub> Ir <sub>0.1</sub> O <sub>3-δ</sub>                                                                               | 10                                     | 0.30              | 1 M KOH     | ACS Appl. Energy Mater. 3, 7, 7149-7158 (2020)          |
| SrCo <sub>0.4</sub> Fe <sub>0.2</sub> W <sub>0.4</sub> O <sub>3-δ</sub>                                                                                                                  | 10                                     | 0.30              | 1 M KOH     | J. Mater. Chem. A. 6, 9854-9859 (2018)                  |
| LaCo <sub>0.8</sub> V <sub>0.2</sub> O <sub>3</sub>                                                                                                                                      | 10                                     | 0.31              | 1 M KOH     | ChemSusChem. 13, 10, 2671-2676 (2020)                   |
| SmBaCo <sub>1.5</sub> Mn <sub>0.5</sub> O <sub>5+δ</sub>                                                                                                                                 | 10                                     | 0.31              | 1 M KOH     | Crystals. 3, 10, 205 (2020)                             |
| La <sub>0.4</sub> Sr <sub>0.6</sub> Ni <sub>0.5</sub> Fe <sub>0.5</sub> O <sub>3</sub>                                                                                                   | 10                                     | 0.32              | 1 M KOH     | Front. Chem. 7, 224 (2019)                              |
| BaCo <sub>0.4</sub> Fe <sub>0.4</sub> Zr <sub>0.1</sub> Y <sub>0.1</sub> O <sub>3-δ</sub>                                                                                                | 10                                     | 0.32              | 1 M KOH     | J. Mater. Chem. A, 6, 17288-17296 (2018)                |
| SrCo <sub>0.5</sub> Fe <sub>0.5</sub> O <sub>3-δ</sub> -800                                                                                                                              | 10                                     | 0.327             | 1 M KOH     | J. Mater. Chem. A, 8, 6480-6486 (2020)                  |
| Sr <sub>3</sub> FeCoO <sub>7-δ</sub>                                                                                                                                                     | 10                                     | 0.343             | 1 M KOH     | J. Mater. Chem. A, 6, 14240-14245 (2018)                |
| Fe-LaNiO <sub>3</sub>                                                                                                                                                                    | 10                                     | 0.35              | 1 M KOH     | Research, 15, 6961578, (2020)                           |
| CQDs@BSCF-NFs                                                                                                                                                                            | 10                                     | 0.35              | 1 M KOH     | Appl. Catal. B, 257, 117919 (2019)                      |
| La <sub>0.5</sub> (Ba <sub>0.4</sub> Sr <sub>0.4</sub> Ca <sub>0.2</sub> ) <sub>0.5</sub> Co <sub>0.8</sub> Fe <sub>0.2</sub> O <sub>3-δ</sub>                                           | 10                                     | 0.35              | 1 M KOH     | Adv. Energy Mater. 7, 1700666 (2017)                    |
| SrCo <sub>0.8</sub> Fe <sub>0.5-x</sub> O <sub>3-δ</sub> /Fe <sub>x</sub> O <sub>y</sub>                                                                                                 | 10                                     | 0.352             | 1 M KOH     | ACS Appl. Mater. Interfaces, 13, 15, 17439-17449 (2021) |
| La <sub>2</sub> NiMnO <sub>6</sub>                                                                                                                                                       | 10                                     | 0.37              | 1 M KOH     | J. Am. Chem. Soc., 140, 36, 11165-11169 (2018)          |

|                                                                                   |    |      |         |                                          |
|-----------------------------------------------------------------------------------|----|------|---------|------------------------------------------|
| SrNb <sub>0.1</sub> Co <sub>0.7</sub> Fe <sub>0.2</sub> O <sub>3-δ</sub> nanorods | 10 | 0.39 | 1 M KOH | Adv. Energy Mater. 7, 1602122 (2017)     |
| LaCo <sub>0.8</sub> Fe <sub>0.2</sub> O <sub>3</sub>                              | 10 | 0.39 | 1 M KOH | ChemElectroChem, 7, 12, 2564-2574 (2020) |
| BPMC/NCNT-20                                                                      | 10 | 0.39 | 1 M KOH | Chem. Commun. 56, 8277-8280 (2020)       |
| LaNiO <sub>3</sub>                                                                | 10 | 0.42 | 1 M KOH | Research, 15, 6961578, (2020)            |
| LaCoO <sub>3</sub>                                                                | 10 | 0.44 | 1 M KOH | J. Electroanal. Chem. 809, 22-30 (2018)  |
| 10 nm films-BSCF-Ni                                                               | 10 | 0.46 | 1 M KOH | Sci. Adv. 3, 1603206 (2017)              |
| La <sub>2</sub> NiFeO <sub>6</sub>                                                | 10 | 0.46 | 1 M KOH | Research, 15, 6961578, (2020)            |
| BaPrMn <sub>1.75</sub> Co <sub>0.25</sub> O <sub>5+δ</sub>                        | 10 | 0.49 | 1 M KOH | Chem. Commun. 56, 8277-8280 (2020)       |
| SrNb <sub>0.1</sub> Co <sub>0.7</sub> Fe <sub>0.2</sub> O <sub>3-δ</sub>          | 10 | 0.50 | 1 M KOH | Adv. Energy Mater. 7, 1602122 (2017)     |
| BSCF thin films                                                                   | 10 | 0.57 | 1 M KOH | Electrochim. Acta, 218, 156-162 (2016)   |
| PrBaCo <sub>2</sub> O <sub>5+δ</sub>                                              | 10 | 0.77 | 1 M KOH | ACS Catal. 7, 10, 7029–7037 (2017)       |
